# Supplementary material for: A glutamatergic DRN–VTA pathway modulates neuropathic pain and comorbid anhedonia-like behavior in mice
Source: PubMed Central journal article supplement (PMC10447530; doi:10.1038/s41467-023-40860-3), 2023-08-23
Supplement: 41467_2023_40860_MOESM1_ESM.pdf [file 41467_2023_40860_MOESM1_ESM.pdf]

1 **A glutamatergic DRN–VTA pathway modulates neuropathic pain and comorbid**  
2 **anhedonia-like behavior in mice**

3 Xin-Yue Wang<sup>1\*</sup>, Wen-Bin Jia<sup>1\*</sup>, Xiang Xu<sup>1</sup>, Rui Chen<sup>1</sup>, Liang-Biao Wang<sup>1</sup>, Xiao-Jing  
4 Su<sup>1</sup>, Peng-Fei Xu<sup>1</sup>, Xiao-Qing Liu<sup>2</sup>, Jie Wen<sup>3</sup>, Xiao-Yuan Song<sup>4</sup>, Yuan-Yuan Liu<sup>5</sup>, Zhi  
5 Zhang<sup>4†</sup>, Xin-Feng Liu<sup>1†</sup> and Yan Zhang<sup>1†</sup>

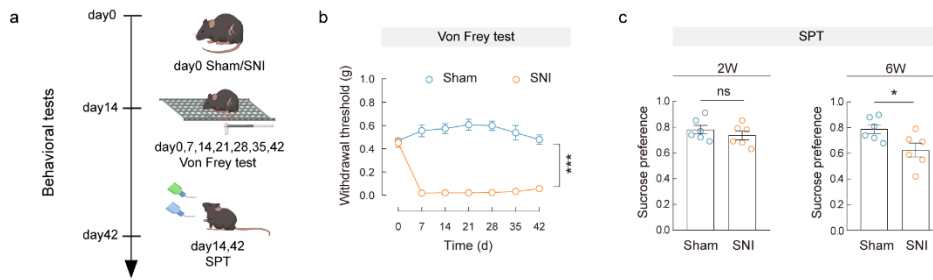

6

7 **Supplementary Fig 1. Time course of SNI-induced mechanical hypersensitivity and**  
 8 **comorbid anhedonia-like behavior.**

9 **a**, Schematic of the experimental design. **b, c**, Performance of mice treated with sham or  
 10 SNI in von Frey test (**b**: Sham, n = 6; SNI, n = 5 mice.  $P = 0.0009$ ) and SPT (**c**: Sham, n  
 11 = 6; SNI, n = 6 mice. 2W  $P = 0.3892$ ; 6W  $P = 0.0312$ ). Significance was assessed by  
 12 two-way ANOVA followed by Bonferroni's multiple comparisons test in (**b**), and  
 13 two-tailed unpaired Student's  $t$ -test in (**c**). All data are presented as the mean  $\pm$  s.e.m.  
 14 \* $P < 0.05$ , \*\*\* $P < 0.001$ , not significant (ns). Details of the statistical analyses are  
 15 presented in Supplementary Data 1. Created with BioRender.com (**a**).

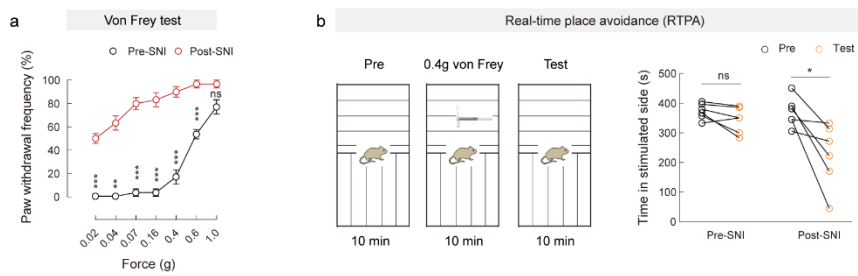

16

17 **Supplementary Fig 2. Mechanical withdrawal frequency to von Frey filament and**  
 18 **RTPA test before and after SNI.**

19 **a**, Statistical data for mechanical withdrawal frequencies to von Frey filaments applied  
 20 on the hind paw in *C57* mice before (pre-SNI) and after (post-SNI 2W) SNI. **b**,  
 21 Experimental design of real-time place avoidance (RTPA) test (left) and quantification  
 22 of RTPA before (Pre) and after (Test) training of the pre-SNI ( $P = 0.0995$ ) or post-SNI  
 23 2W ( $P = 0.0237$ ) mice (right).  $n = 6$  mice per group in panels (**a**, **b**). Significance was  
 24 assessed by two-way ANOVA followed by Bonferroni's multiple comparisons test in  
 25 (**a**) and two-tailed paired Student's *t*-test in (**b**). All data are presented as the mean  $\pm$   
 26 s.e.m. \* $P < 0.05$ , \*\* $P < 0.01$ , \*\*\* $P < 0.001$ , not significant (ns). Details of the  
 27 statistical analyses are presented in Supplementary Data 1.

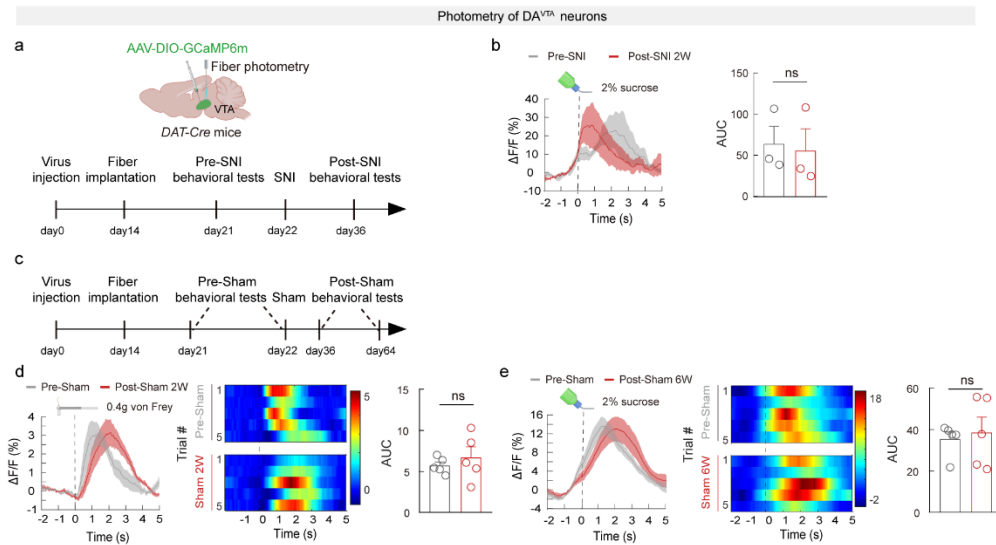

28

29 **Supplementary Fig 3. Ca<sup>2+</sup> signal of DA<sup>VTA</sup> neurons in *DAT-Cre* mice.**

30 **a**, Schematic of the experimental design and schematic diagram of fiber photometry of  
 31 DA<sup>VTA</sup> neurons. **b**, Averaged responses (left) and AUC during 0-5 s (right) showing  
 32 Ca<sup>2+</sup> responses evoked by sucrose licking in pre- and post-SNI 2W mice. (n = 3 mice.  
 33 *P* = 0.2400). **c**, Schematic of the experimental design. **d**, **e**, Averaged responses (left),  
 34 heatmaps (middle), and AUC during 0-5 s (right) showing Ca<sup>2+</sup> responses evoked by  
 35 0.4g von Frey stimulation in pre- and post-Sham 2W mice (**d**: n = 5 mice. *P* = 0.4480)  
 36 and sucrose licking in pre- and post-Sham 6W mice (**e**: n = 5 mice. *P* = 0.6404).  
 37 Significance was assessed by two-tailed paired Student's *t*-test in (**b**, **d**, **e**). All data are  
 38 presented as the mean ± s.e.m. Not significant (ns). Details of the statistical analyses  
 39 are presented in Supplementary Data 1. Created with BioRender.com (**a**, **b**, **d**, **e**).

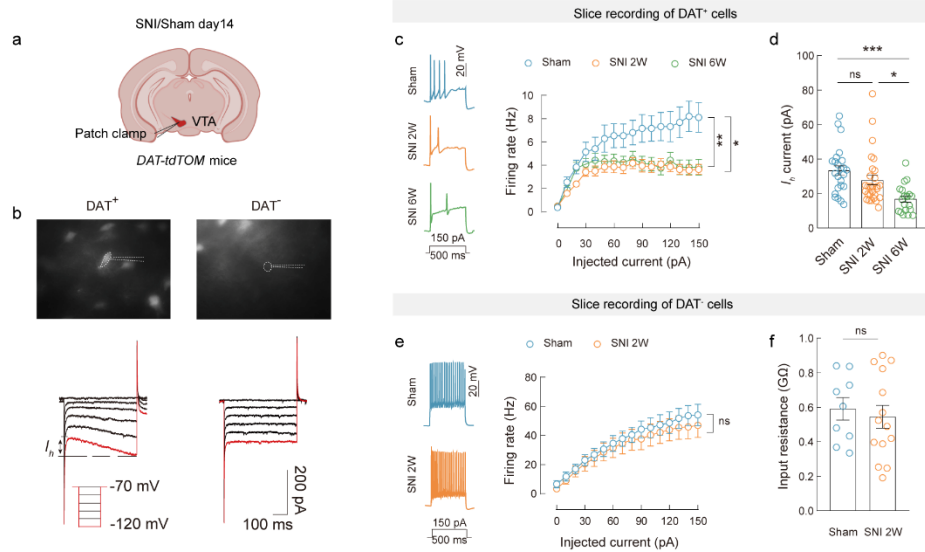

40

41 **Supplementary Fig 4. The excitability of VTA neurons in SNI and Sham mice.**

42 **a**, Schematic of the electrophysiological recordings in acute slices. **b**, Typical currents  
 43 induced by hyperpolarizing voltage steps recorded from the DAT<sup>+</sup> (tdTOM positive)  
 44 and DAT<sup>-</sup> (tdTOM negative) neurons. **c**, Representative traces (left) and statistical  
 45 data (right) of firing rate recorded from DAT<sup>+</sup> neurons of Sham, post-SNI 2W, and  
 46 post-SNI 6W mice. Sham, n = 23 cells from 3 mice; SNI 2W, n = 27 cells from 3 mice;  
 47 SNI 6W, n = 30 cells from 4 mice. Sham vs SNI 2W  $P = 0.0056$ ; Sham vs SNI 6W  $P$   
 48  $= 0.0112$ . **d**, Statistical data of hyperpolarization-activated currents ( $I_h$ ) at -120 mV  
 49 recorded from DAT<sup>+</sup> neurons. Sham, n = 24 cells from 3 mice; SNI 2W, n = 28 cells  
 50 from 3 mice; SNI 6W, n = 20 cells from 3 mice. Sham vs SNI 2W  $P = 0.3945$ ; Sham  
 51 vs SNI 6W  $P = 0.0002$ ; SNI 2W vs SNI 6W  $P = 0.0151$ . **e**, Representative traces and  
 52 statistical data of firing rate recorded from DAT<sup>-</sup> neurons of post-SNI 2W and Sham mice.  
 53 Sham, n = 8 cells from 3 mice; SNI 2W, n = 11 cells from 3 mice.  $P > 0.9999$ . **f**,  
 54 Statistical data for input resistance recorded from DAT<sup>-</sup> neurons of post-SNI 2W and  
 55 Sham mice. Sham, n = 9 cells from 3 mice; SNI 2W, n = 14 cells from 3 mice.  $P =$   
 56  $0.6418$ . Significance was assessed by two-way ANOVA followed by Bonferroni's  
 57 multiple comparisons test in (**c**, **e**), one-way ANOVA followed by Bonferroni's multiple  
 58 comparisons test in (**d**), and two-tailed unpaired Student's  $t$ -test in (**f**). All data are  
 59 presented as the mean  $\pm$  s.e.m. \* $P < 0.05$ , \*\* $P < 0.01$ , \*\*\* $P < 0.001$ , not significant

60 (ns). Details of the statistical analyses are presented in Supplementary Data 1. Created  
61 with BioRender.com (**a**).

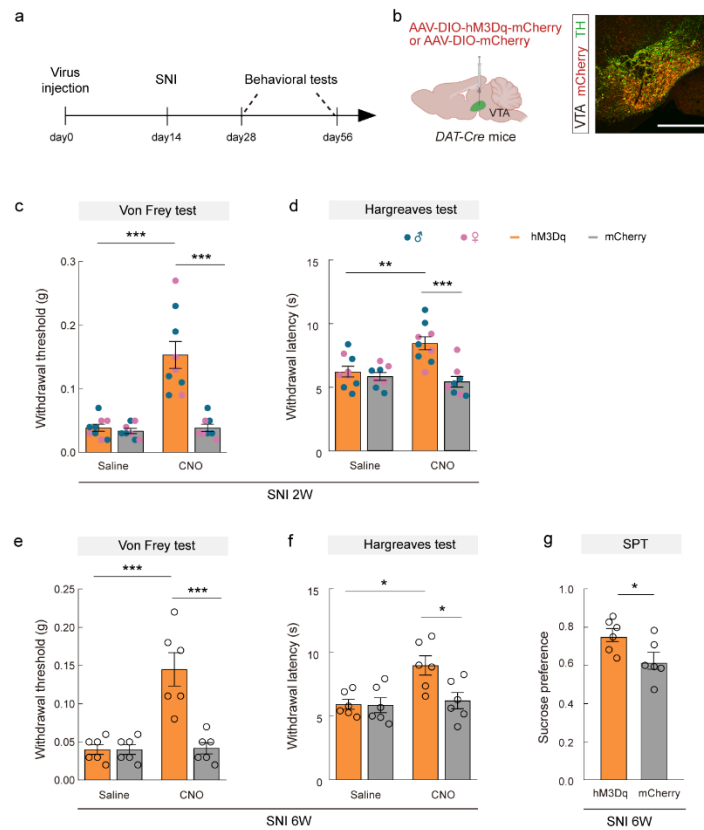

62

63 **Supplementary Fig 5. Effects of chemogenetic activation of DA<sup>VTA</sup> neurons on**  
 64 **chronic pain.**

65 **a**, Schematic of the experimental design. **b**, Schematic of VTA injection of  
 66 AAV-DIO-hM3Dq-mCherry/AAV-DIO-mCherry (left) in *DAT-Cre* mice and  
 67 representative images of mCherry-expressing neurons co-localized with TH  
 68 immunofluorescence in the VTA (right). Scale bar, 500  $\mu$ m. **c-f**, Statistical data for  
 69 mechanical paw withdrawal threshold (**c**: hM3Dq, n = 9; mCherry, n = 8.  $P < 0.0001$ ,  
 70 **e**: hM3Dq, n = 6; mCherry, n = 6.  $P < 0.0001$ ), thermal paw withdrawal latency (**d**:  
 71 hM3Dq, n = 9; mCherry, n = 8. hM3Dq&CNO vs hM3Dq&Saline  $P = 0.0045$ ;  
 72 hM3Dq&CNO vs mCherry&CNO  $P = 0.0002$ , **f**: hM3Dq, n = 6; mCherry, n = 6.  
 73 hM3Dq&CNO vs hM3Dq&Saline  $P = 0.0115$ ; hM3Dq&CNO vs mCherry&CNO  $P =$   
 74  $0.0248$ ), and SPT (**g**: hM3Dq, n = 6; mCherry, n = 6.  $P = 0.0374$ ) of  
 75 hM3Dq-mCherry-expressing and mCherry-expressing SNI mice with saline or CNO  
 76 treatment. Significance was assessed by two-way ANOVA followed by Bonferroni's

77 multiple comparisons test in **(c-f)** and two-tailed unpaired Student's *t*-test in **(g)**. All  
78 data are presented as the mean  $\pm$  s.e.m. \**P* < 0.05, \*\**P* < 0.01, \*\*\**P* < 0.001. Details  
79 of the statistical analyses are presented in Supplementary Data 1. Created with  
80 BioRender.com **(b)**.



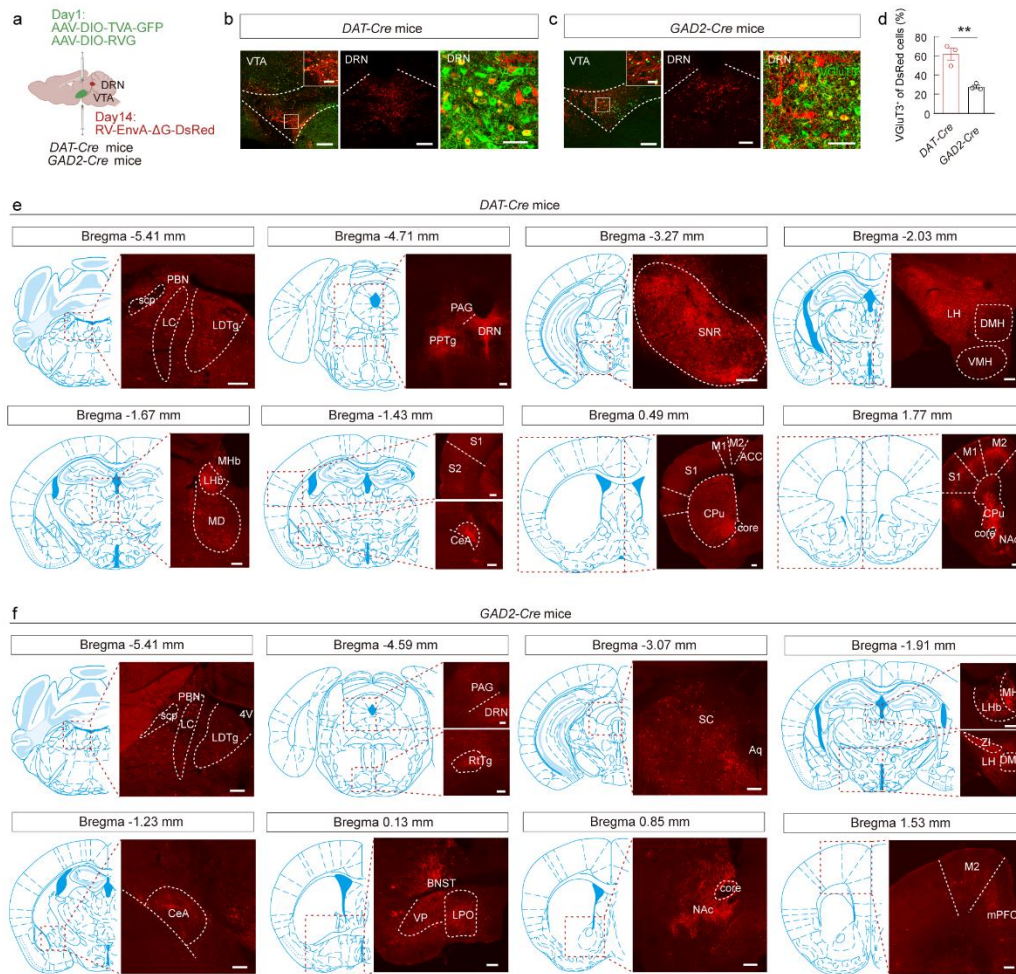

81

82 **Supplementary Fig 6. Mapping of monosynaptic inputs to DA<sup>VTA</sup> and GABA<sup>VTA</sup>**  
 83 **neurons.**

84 **a**, Schematic of the Cre-dependent retrograde monosynaptic tracing strategy in  
 85 *DAT-Cre* and *GAD2-Cre* mice. **b**, **c**, Representative images of the starter cells in the  
 86 VTA (left) and RV-DsRed-labeled cells in the DRN (middle) which co-localize with  
 87 VGlut3 immunofluorescence (right) from *DAT-Cre* (**b**) mice and *GAD2-Cre* mice (**c**).  
 88 Starter cells (yellow) co-express AAV-DIO-TVA-GFP, AAV-DIO-RVG (green), and  
 89 rabies RV-EnvA-ΔG-DsRed (red). Scale bars, 200 μm (left, middle) and 50 μm (upper,  
 90 right). **d**, Summary data for the percentage of DsRed-labeled neurons that expressed  
 91 VGlut3 in *DAT-Cre* and *GAD2-Cre* mice, n = 9 sections from 3 mice. *P* = 0.0068. **e**, **f**,  
 92 Sample images showing DsRed-expressing cells (red) that make monosynaptic inputs  
 93 onto DA<sup>VTA</sup> neurons or GABA<sup>VTA</sup> neurons. Scale bars, 200 μm. PBN, parabrachial

94 nucleus; LC, locus coeruleus; LDTg, laterodorsal tegmentum; PAG, periaqueductal  
95 gray; DRN, dorsal raphe nucleus; PPTg, pedunculopontine tegmentum; SNR,  
96 substantia nigra pars reticulata; LH, lateral hypothalamus; DMH, dorsomedial  
97 hypothalamus; VMH, ventromedial hypothalamus; LHb, lateral habenular nucleus;  
98 MHb, medial habenular nucleus; MD, mediodorsal thalamic nucleus; CeA, central  
99 nucleus of the amygdala; CPu, caudate putamen; S1, primary somatosensory cortex;  
100 S2, secondary somatosensory cortex; M1, primary motor cortex; M2, secondary motor  
101 cortex. ACC, anterior cingulate cortex; NAc, nucleus accumbens; BNST, bed nucleus  
102 of the stria terminalis; RtTg, reticulotegmental nucleus of the pons; ZI, zona incerta;  
103 SC, superior colliculus; VP, ventral pallidum; LPO, lateral preoptic area; mPFC,  
104 medial prefrontal cortex. Significance was assessed by two-tailed unpaired Student's  
105 *t*-test in **(d)**. Data in **(d)** are presented as the mean  $\pm$  s.e.m.  $**P < 0.01$ . Details of the  
106 statistical analyses are presented in Supplementary Data 1. Created with  
107 BioRender.com **(a)**.

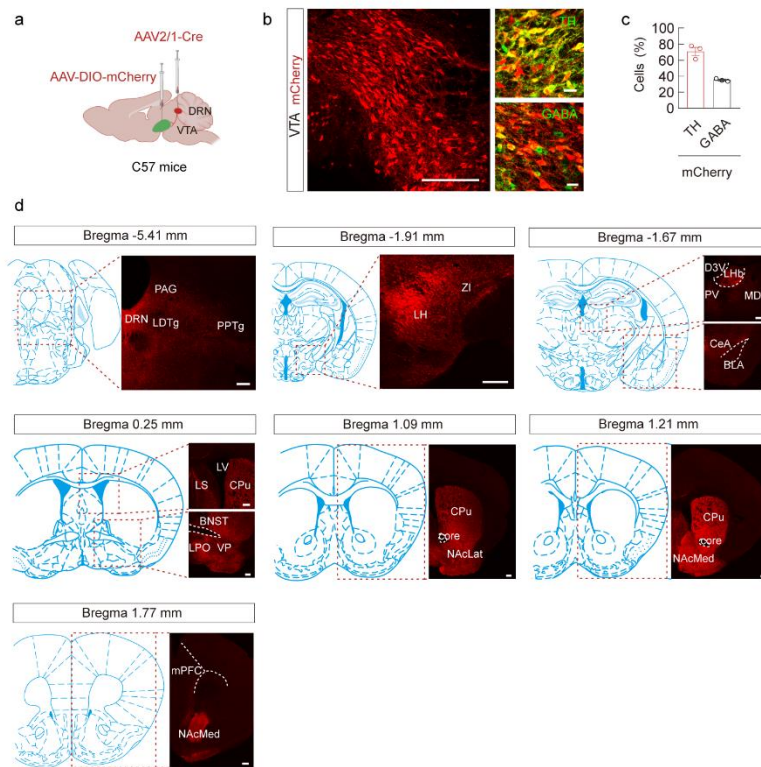

108

109 **Supplementary Fig 7. Cre-dependent anterograde trans-monosynaptic tracing of**  
 110 **DRN neurons.**

111 **a**, Schematic of the Cre-dependent anterograde trans-monosynaptic tracing strategy in  
 112 C57 mice. **b**, Typical images showing mCherry expression within the VTA. Scale bars,  
 113 200  $\mu$ m (left) and 100  $\mu$ m (right). **c**, Summary data for the percentage of  
 114 mCherry-labeled neurons co-localized with TH and GABA immunofluorescence within  
 115 the VTA, n = 6 sections from 3 mice (right). **d**, Neural terminals expressing mCherry in  
 116 different brain regions. Scale bars, 200  $\mu$ m. PBN, parabrachial nucleus; LDTg,  
 117 laterodorsal tegmentum; PAG, periaqueductal gray; DRN, dorsal raphe nucleus; PPTg,  
 118 pedunclopontine tegmentum; LH, lateral hypothalamus; ZI, zona incerta; LHb,  
 119 lateral habenular nucleus; PV, paraventricular thalamic nucleus; MD, mediodorsal  
 120 thalamic nucleus; BLA, basolateral amygdala; CeA, central nucleus of the amygdala;  
 121 LS, lateral septal nucleus; CPu, caudate putamen; LPO, lateral preoptic area; BNST,  
 122 bed nucleus of the stria terminalis; VP, ventral pallidum; NAcLat, NAc lateral shell;  
 123 NAcMed, NAc medial shell; mPFC, medial prefrontal cortex. Data in (c) are

124 presented as the mean  $\pm$  s.e.m. Created with BioRender.com (**a**).

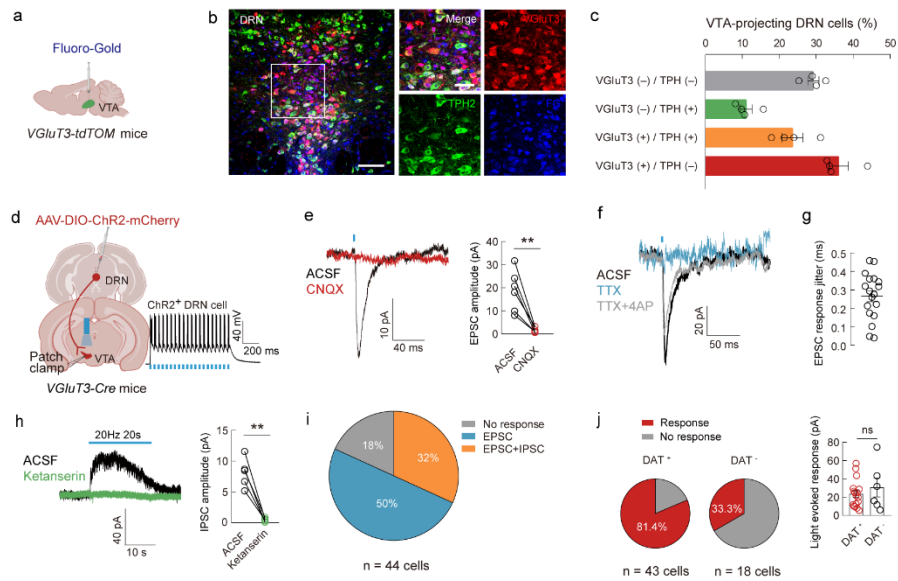

125

126 **Supplementary Fig 8. Dopamine neurons are the primary postsynaptic target of**  
 127 **the VGluT3<sup>DRN</sup> neurons.**

128 **a**, Schematic diagram of retrograde tracer FG injected into the VTA. **b**, Typical  
 129 images of the FG (blue) neurons co-localize with TPH2 immunofluorescence (green)  
 130 in the DRN of *VGluT3-tdTOM* mice. Scale bars, 100  $\mu$ m (left) and 50  $\mu$ m (right). **c**,  
 131 Percentage of FG-labeled neurons that expressed VGluT3 and TPH2 in the DRN, n =  
 132 15 sections from four mice. **d**, Schematic showing viral injection and VTA  
 133 electrophysiological recordings in acute slices from *VGluT3-Cre* mice (left). Viral  
 134 expression efficacy proved by light (473 nm, 20 Hz)-evoked action potentials of  
 135 ChR2-mCherry-expressing neuron (right). **e**, Representative traces and summary data  
 136 for light-evoked EPSCs of VTA neurons before (ACSF) and after CNQX (10  $\mu$ M)  
 137 treatment. n = 6 cells from 3 mice.  $P = 0.0040$ . **f**, Representative traces of  
 138 light-evoked EPSCs of the VTA neurons before (ACSF) and after TTX (1  $\mu$ M) or  
 139 TTX and 4-AP (100  $\mu$ M) treatment. **g**, Summary data for the jitter of light-evoked  
 140 EPSCs recorded from VTA neurons. n = 18 cells from 3 mice. **h**, Representative  
 141 traces and summary data for light-evoked (473 nm, 20 s, 20 Hz) slow IPSCs of VTA  
 142 neurons before and after ketanserin (10  $\mu$ M) treatment. n = 5 cells from 3 mice.  $P =$   
 143 0.0019. **i**, Pie chart showing the distribution of light-evoked response types in

144 DRN-targeted VTA neurons.  $n = 44$  cells from 5 mice. **j**, Summary data for the  
145 percentage (left: DAT<sup>+</sup>,  $n = 43$  cells from 5 mice; DAT<sup>-</sup>,  $n = 18$  cells from 3 mice) and  
146 amplitudes (right: DAT<sup>+</sup>,  $n = 17$  cells from 4 mice; DAT<sup>-</sup>,  $n = 6$  cells from 3 mice.  $P =$   
147 0.4247) of light-evoked fast EPSCs recorded from DAT<sup>+</sup> and DAT<sup>-</sup> neurons.  
148 Significance was assessed by two-tailed paired Student's  $t$ -test in (**e**, **h**), and  
149 two-tailed unpaired Student's  $t$ -test in (**j**). All data are presented as the mean  $\pm$  s.e.m.  
150  $**P < 0.01$ , not significant (ns). Details of the statistical analyses are presented in  
151 Supplementary Data 1. Created with BioRender.com (**a**, **d**).

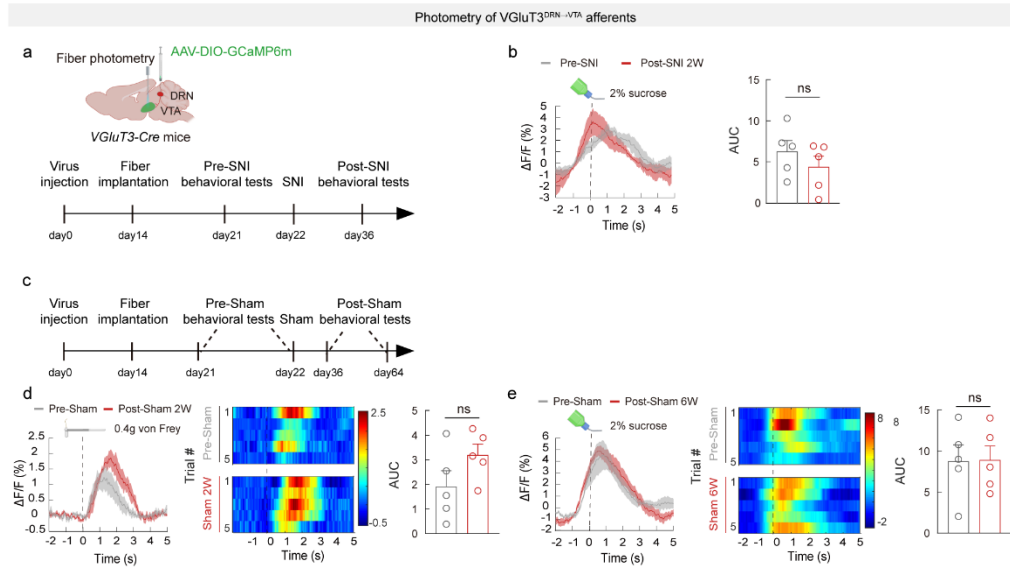

152

153 **Supplementary Fig 9. Ca<sup>2+</sup> signal of VGluT3<sup>DRN→VTA</sup> afferents.**

154 **a**, Schematic of the experimental design and schematic diagram of fiber photometry of  
 155 *VGluT3-Cre* mice. **b**, Averaged responses (left) and AUC during 0-5 s (right) showing  
 156 Ca<sup>2+</sup> responses evoked by sucrose licking in pre- and post-SNI 2W mic.  $P = 0.2607$ . **c**,  
 157 Schematic of the experimental design. **d**, **e**, Averaged responses (left), heatmaps  
 158 (middle), and AUC during 0-5 s (right) showing Ca<sup>2+</sup> responses evoked by 0.4g von  
 159 Frey stimulation in pre- and post-Sham 2W mice (**d**:  $P = 0.1247$ ) and sucrose licking  
 160 in pre- and post-Sham 6W mice (**e**:  $P = 0.9502$ ).  $n = 5$  mice per group in panels (**b**, **d**,  
 161 **e**). Significance was assessed by two-tailed unpaired Student's *t*-test in (**b**, **d**, **e**). All  
 162 data are presented as the mean  $\pm$  s.e.m. Not significant (ns). Details of the statistical  
 163 analyses are presented in Supplementary Data 1. Created with BioRender.com (**a**, **b**, **d**,  
 164 **e**).

165

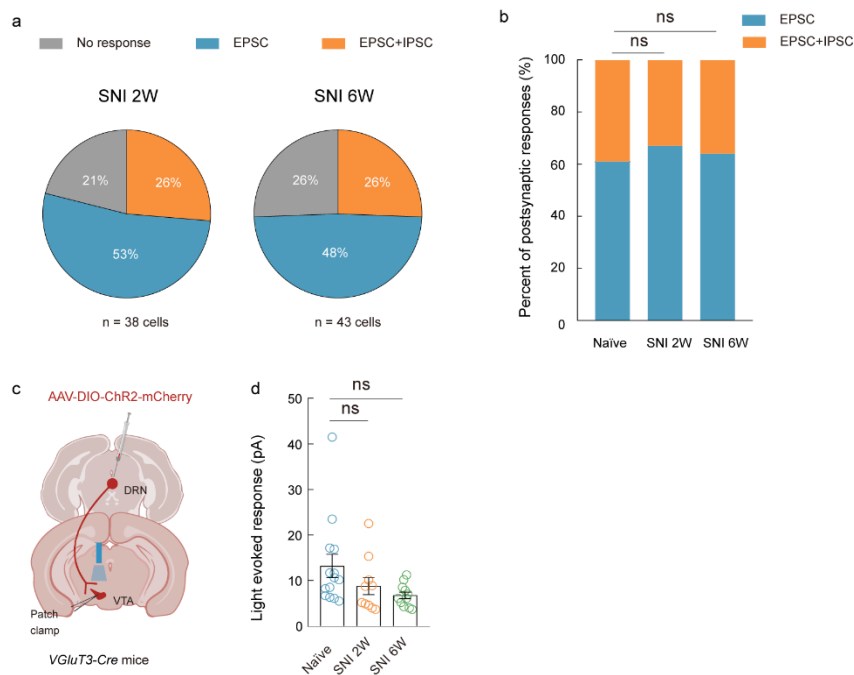

166

167 **Supplementary Fig 10. Analysis of nerve injury-induced changes in the**  
 168 **postsynaptic responses of  $VGluT3^{DRN}$ -targeted VTA neurons.**

169 **a**, Pie chart showing the distribution of light-evoked response types in  
 170  $VGluT3^{DRN}$ -targeted VTA neurons of post-SNI 2W and post-SNI 6W mice. naïve vs  
 171 SNI 2W  $P = 0.8502$ ; naïve vs SNI 6W  $P = 0.6552$ . **b**, A bar graph illustrating the  
 172 percentage of EPSC-type and EPSC+IPSC-type responses in all postsynaptic  
 173 responses recorded from naïve (n = 44 cells from 5 mice), post-SNI 2W (n = 38 cells  
 174 from 4 mice) and 6W mice (n = 43 cells from 4 mice). naïve vs SNI 2W  $P = 0.4615$ ;  
 175 naïve vs SNI 6W  $P = 0.7703$ . **c**, Schematic showing viral injection and the  
 176 electrophysiological recordings in acute slices from *VGluT3-Cre* mice. **d**, Statistical  
 177 data for the amplitudes of light-evoked slow IPSCs in  $VGluT3^{DRN}$ -targeted VTA  
 178 neurons. (naïve, n = 14 cells from 3 mice; post-SNI 2W, n = 10 cells from 3 mice;  
 179 post-SNI 6W, n = 11 cells from 3 mice. naïve vs SNI 2W  $P = 0.2866$ ; naïve vs SNI  
 180 6W  $P = 0.0609$ ). Significance was assessed by two-tailed Chi-square test between  
 181 groups in **(a)**, two-tailed Fisher's exact test in **(b)**, and one-way ANOVA followed by  
 182 Bonferroni's multiple comparisons test in **(d)**. All data are presented as the mean  $\pm$



183 s.e.m. Not significant (ns). Details of the statistical analyses are presented in  
184 Supplementary Data 1. Created with BioRender.com (c).

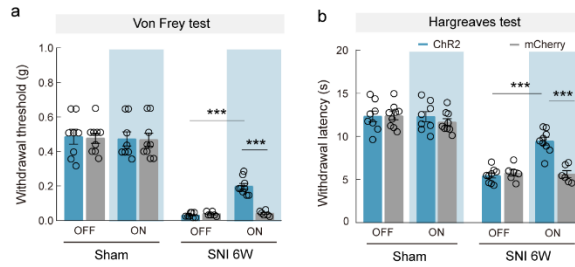

185

186 **Supplementary Fig 11. VGluT3<sup>DRN</sup>→DA<sup>VTa</sup> circuit contributes to analgesic effects**  
 187 **in post-SNI 6W mice.**

188 **a, b**, Mechanical paw withdrawal threshold (**a**: ChR2&ON vs ChR2&OFF  $P < 0.0001$ ;  
 189 ChR2&ON vs mCherry&ON  $P < 0.0001$ ) and thermal paw withdrawal latency (**b**:  
 190 ChR2&ON vs ChR2&OFF  $P < 0.0001$ , ChR2&ON vs mCherry&ON  $P < 0.0001$ ) of  
 191 ChR2-mCherry-expressing and mCherry-expressing Sham or post-SNI 6W mice with  
 192 (on) or without (off) optogenetic stimulation. Sham&ChR2,  $n = 8$ ; Sham&mCherry,  $n$   
 193  $= 9$ ; SNI&ChR2,  $n = 9$ ; SNI&mCherry,  $n = 6$ . Significance was assessed by two-way  
 194 ANOVA followed by Bonferroni's multiple comparisons test in (**a, b**). All data are  
 195 presented as the mean  $\pm$  s.e.m. \*\*\* $P < 0.001$ , not significant (ns). Details of the  
 196 statistical analyses are presented in Supplementary Data 1.

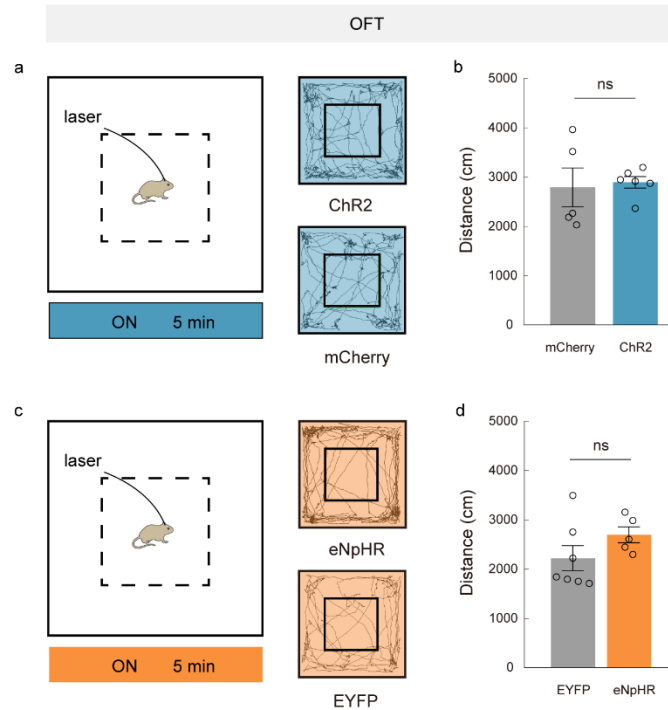

198

199 **Supplementary Fig 12. Motor activity in mice with light stimulation of**  
 200 **VGluT3<sup>DRN→VTA</sup> afferents.**

201 **a, c** Experimental design (left) and representative trajectories (right) of animals  
 202 expressing ChR2/mCherry (**a**) or eNpHR/EYFP (**c**) in VGluT3<sup>DRN</sup> neurons during VTA  
 203 light stimulation. **b, d**, Mean distance of ChR2/mCherry-expressing (**b**: ChR2, n = 6;  
 204 mCherry, n = 5.  $P = 0.7904$ ) and eNpHR/EYFP-expressing (**d**: eNpHR, n = 5; EYFP, n  
 205 = 7.  $P = 0.1855$ ) mice with 20 Hz optostimulation in OFT. Significance was assessed by  
 206 two-tailed unpaired Student's  $t$ -test in (**b, d**). All data are presented as the mean  $\pm$   
 207 s.e.m. Not significant (ns). Details of the statistical analyses are presented in  
 208 Supplementary Data 1.

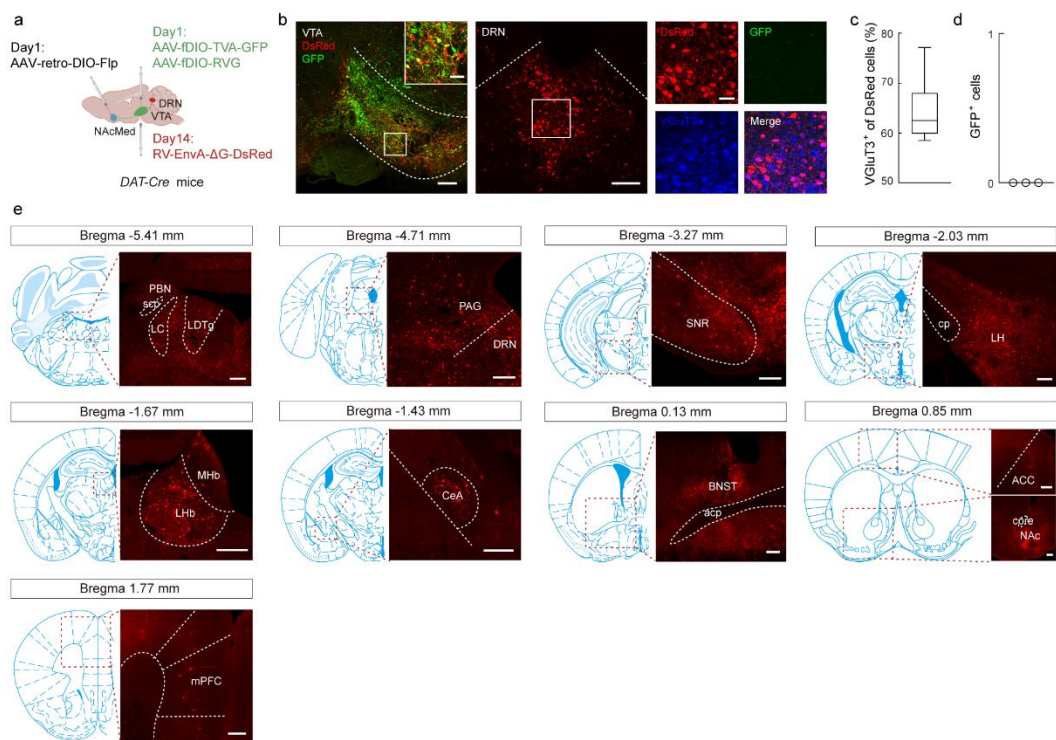

209

210 **Supplementary Fig 13. Presynaptic input to NAcMed-projecting DA<sup>VTA</sup> neurons**  
 211 **revealed by cTRIO-based mediated trans-synaptic tracing.**

212 **a**, Schematic of cTRIO based retrograde monosynaptic tracing using *DAT-Cre* mice. **b**,  
 213 Representative images of the starter cells in the VTA (left) and RV-DsRed-labeled  
 214 cells in the DRN (middle) which co-localize with VGluT3 immunofluorescence  
 215 (right). Starter cells (yellow) co-expressing AAV-fDIO-TVA-GFP, AAV-fDIO-RVG  
 216 (green), and rabies RV-EnvA-ΔG-DsRed (red). Scale bars, 50 μm (upper) and 200 μm  
 217 (bottom). **c**, Percentage of DsRed-labeled neurons in the DRN that express VGluT3 in  
 218 *DAT-Cre* mice, n = 9 sections from three mice. **d**, GFP-expressing neurons in the  
 219 DRN. n = 3 mice. **e**, Representative images showing DsRed-expressing cells (red) that  
 220 make monosynaptic contact onto NAcMed-projecting DA<sup>VTA</sup> neurons. Scale bars, 200  
 221 μm. PBN, parabrachial nucleus; LC, locus coeruleus; LDTg, laterodorsal tegmentum;  
 222 PAG, periaqueductal gray; DRN, dorsal raphe nucleus; SNR, substantia nigra pars  
 223 reticulata; LH, lateral hypothalamus; LHb, lateral habenular nucleus; MHb, medial  
 224 habenular nucleus; CeA, central nucleus of the amygdala; BNST, bed nucleus of the  
 225 stria terminalis; ACC, anterior cingulate cortex; NAc, nucleus accumbens; mPFC,

226 medial prefrontal cortex. Data in (c) are shown as box and whisker plots (medians,  
227 quartiles (boxes), and ranges minimum to maximum (whiskers). Created with  
228 BioRender.com (a).

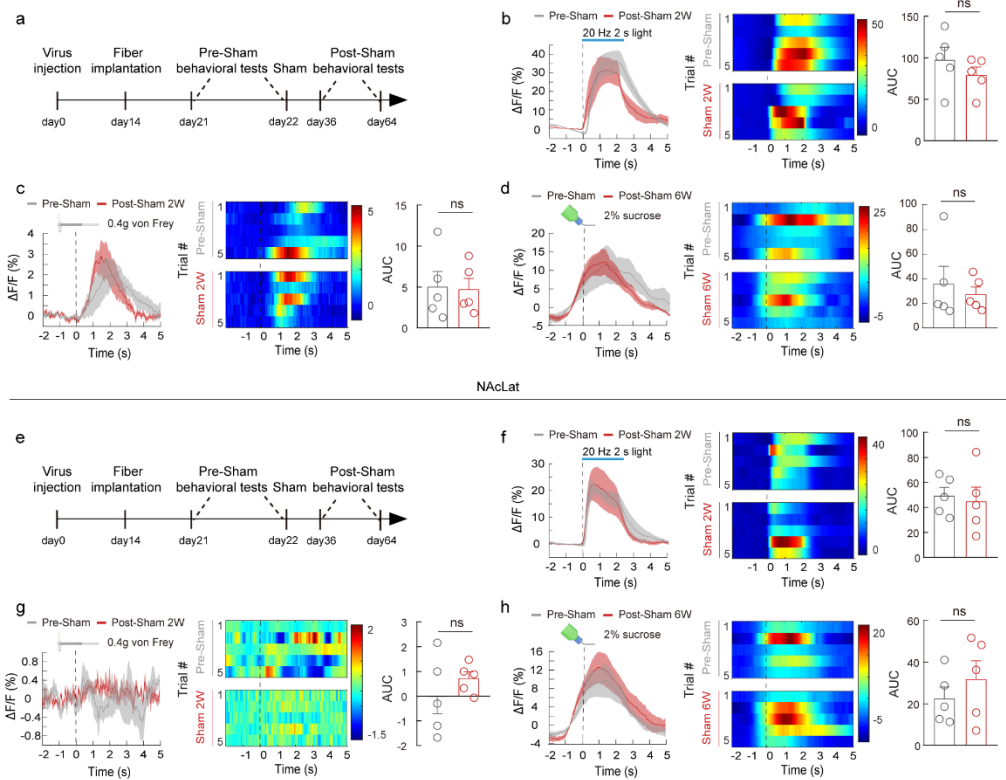

229

230 **Supplementary Fig 14. DA2m signals evoked by optogenetic activation of**  
 231 **VGlut3<sup>DRN→VTA</sup> terminals in sham mice.**

232 **a, e**, Schematic of the experimental design. **b-d, f-h**, Averaged responses (left),  
 233 heatmaps (middle), and AUC during 0-5 s (right) showing DA2m signals evoked by  
 234 optogenetic activation of VGlut3<sup>DRN→VTA</sup> terminals (**b**:  $P = 0.1252$ , **f**:  $P = 0.8037$ ) and  
 235 0.4g von Frey stimulation (**c**:  $P = 0.8496$ , **g**:  $P = 0.4663$ ) in pre- and post-Sham 2W  
 236 mice, sucrose licking in pre- and post-Sham 6W mice (**d**:  $P = 0.5096$ , **h**:  $P = 0.3273$ ).  
 237 NAcMed group,  $n = 5$ ; NAcLat group,  $n = 5$ . Significance was assessed by two-tailed  
 238 paired Student's  $t$ -test in (**b-d, f-h**). All data are presented as the mean  $\pm$  s.e.m. Not  
 239 significant (ns). Details of the statistical analyses are presented in Supplementary Data  
 240 1. Created with BioRender.com (**c, d, g, h**).

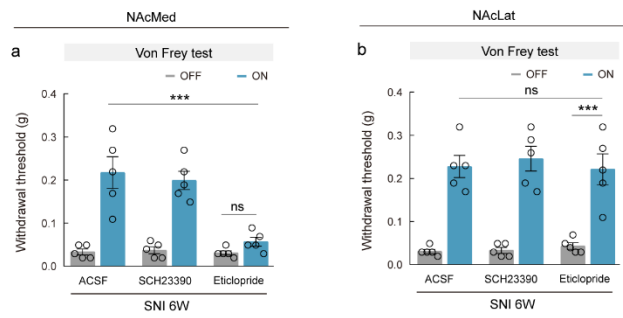

241

242 **Supplementary Fig 15. D2 receptors within NAcMed contribute to pain relief**  
 243 **through VGlut3<sup>DRN</sup>→DA<sup>VTA</sup> circuit in post-SNI 6W mice.**

244 **a, b,** Effects of optogenetic activation of VGlut3<sup>DRN</sup>→VTA terminals on punctate  
 245 mechanical hypersensitivity with drug infusion into the NAcMed (**a:** ACSF&ON vs  
 246 Eticlopride&ON  $P < 0.0001$ ; Eticlopride&ON vs Eticlopride&OFF  $P > 0.9999$ ) or  
 247 NAcLat (**b:** ACSF&ON vs Eticlopride&ON  $P > 0.9999$ ; Eticlopride&ON vs  
 248 Eticlopride&OFF  $P < 0.0001$ ) in post-SNI 6W mice. NAcMed group,  $n = 5$ ; NAcLat  
 249 group,  $n = 5$ . Significance was assessed by two-way ANOVA followed by  
 250 Bonferroni's multiple comparisons test. All data are presented as the mean  $\pm$  s.e.m.  
 251 \*\*\* $P < 0.001$ , not significant (ns). Details of the statistical analyses are presented in  
 252 Supplementary Data 1.

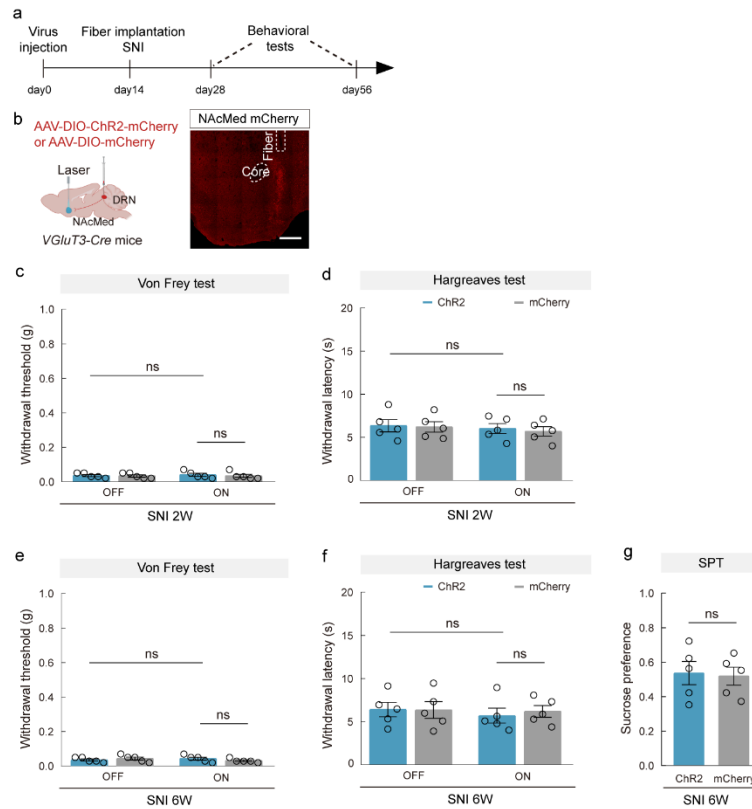

253

254 **Supplementary Fig 16. Effects of activation of VGlut3<sup>DRN</sup> neural terminals**  
 255 **within the NAcMed on chronic pain hypersensitivity and CAB.**

256 **a**, Schematic of the experimental design. **b**, Schematic of DRN injection of  
 257 AAV-DIO-ChR2-mCherry/AAV-DIO-mCherry and representative images showing  
 258 NAcMed optical fiber implantation in *VGlut3*-Cre mice. Scale bars, 500  $\mu$ m. **c-f**,  
 259 Mechanical paw withdrawal threshold (**c**: ChR2&ON vs ChR2&OFF  $P > 0.9999$ ;  
 260 ChR2&ON vs mCherry&ON  $P > 0.9999$ , **e**: ChR2&ON vs ChR2&OFF  $P > 0.9999$ ;  
 261 ChR2&ON vs mCherry&ON  $P > 0.9999$ ) and thermal paw withdrawal latency (**d**:  
 262 ChR2&ON vs ChR2&OFF  $P > 0.9999$ ; ChR2&ON vs mCherry&ON  $P > 0.9999$ , **f**:  
 263 ChR2&ON vs ChR2&OFF  $P > 0.9999$ ; ChR2&ON vs mCherry&ON  $P > 0.9999$ ) of  
 264 ChR2-mCherry-expressing and mCherry-expressing SNI mice with (on) or without  
 265 (off) optogenetic stimulation. **g**, Preference for sucrose in the SPT,  $P = 0.8377$ .  $n = 5$   
 266 mice per group in panels (**c-g**). Significance was assessed by two-way ANOVA  
 267 followed by Bonferroni's multiple comparisons test in (**c-f**) and two-tailed unpaired  
 268 Student's  $t$ -test in (**g**). All data are presented as the mean  $\pm$  s.e.m. Not significant (ns).



269 Details of the statistical analyses are presented in Supplementary Data 1. Created with  
270 BioRender.com (**b**).

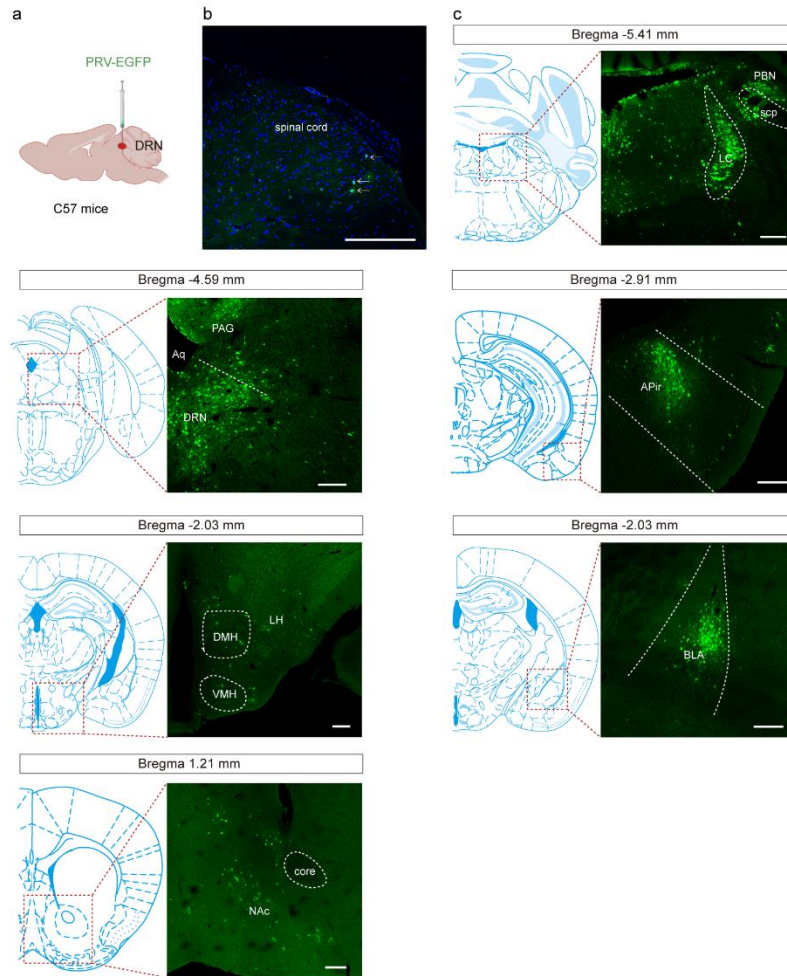

271

272 **Supplementary Fig 17. Retrograde and trans-synaptic tracing of DRN-upstream**  
 273 **neurons with PRV-EGFP injection.**

274 **a**, Schematic of the retrograde and trans-synaptic tracing strategy using PRV-EGFP in  
 275 C57 mice. **b**, EGFP-expressing neurons detected in the spinal dorsal horn. Scale bars,  
 276 200  $\mu\text{m}$ . **c**, Sample images showing EGFP-expressing cells (green) that make  
 277 trans-synaptic inputs onto DRN neurons. Scale bars, 200  $\mu\text{m}$ . PBN, parabrachial  
 278 nucleus; PAG, periaqueductal gray; LC, locus coeruleus; DRN, dorsal raphe nucleus;  
 279 APir, amygdalopiriform transition area; LH, lateral hypothalamus; DMH, dorsomedial  
 280 hypothalamus; VMH, ventromedial hypothalamus; BLA, basolateral amygdala; NAc,  
 281 nucleus accumbens. Created with BioRender.com (**a**).

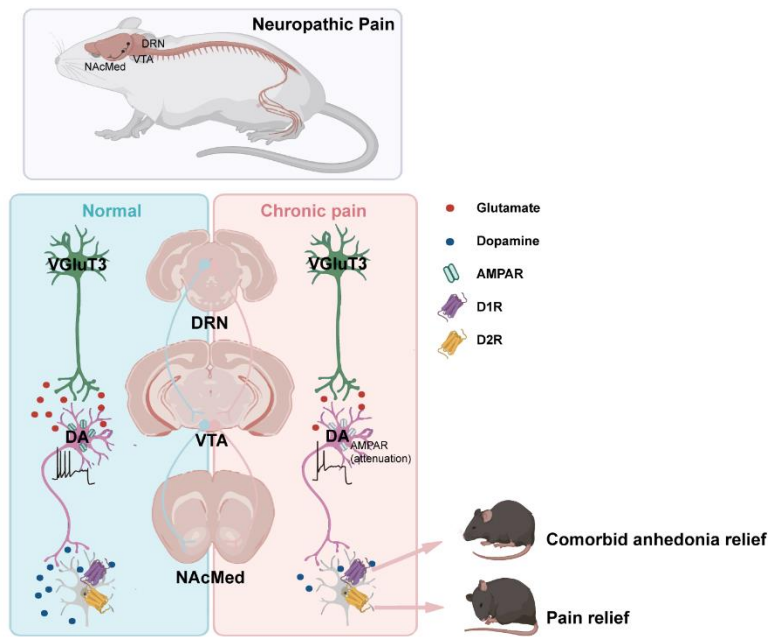

282

283 **Supplementary Fig 18. Schematic summary of maladaptive changes of**

284 **VGluT3<sup>DRN</sup>→DA<sup>VTA</sup>→D1/D2<sup>NAcMed</sup> circuit during neuropathic pain.**

285 In the chronic pain state, the VGluT3<sup>DRN</sup>→DA<sup>VTA</sup> circuit undergoes decreased  
286 presynaptic glutamate release and undermined postsynaptic response to glutamate,

287 leading to hypoexcitability of DA<sup>VTA</sup> neurons and thus reducing dopamine release into

288 the NAcMed. Gain-of-function of VGluT3<sup>DRN</sup>→DA<sup>VTA</sup> circuit efficiently relieves

289 neuropathic pain and comorbid anhedonia-like behavior via D2R and D1R in the

290 NAcMed, respectively. Created with BioRender.com.
