# Supplementary material for: A glutamatergic DRN–VTA pathway modulates neuropathic pain and comorbid anhedonia-like behavior in mice
Source: PubMed Central journal article supplement (PMC10447530; doi:10.1038/s41467-023-40860-3), 2023-08-23
Supplement: 41467_2023_40860_MOESM3_ESM.pdf [file 41467_2023_40860_MOESM3_ESM.pdf]

## **Description of Additional Supplementary Files**

File Name: Supplementary Data 1

Description: Details of the statistical analyses.
